# Supplementary material for: Measuring visually guided motor performance in ultra low vision using virtual reality
Source: Frontiers journal article supplement (doi:10.3389/fnins.2023.1251935), 2023-12-20
Supplement: Data_Sheet_1.PDF [file Data_Sheet_1.PDF]

| No.          | Item                        | Task Description                                                                                            | Visibility | Steps                                                                                                            |
|--------------|-----------------------------|-------------------------------------------------------------------------------------------------------------|------------|------------------------------------------------------------------------------------------------------------------|
| 5-step Tasks |                             |                                                                                                             |            |                                                                                                                  |
| 1            | Cooking Pancakes            | Pour batter on to a pan to make a pancake, flip the pancake with a spatula and then transfer to a plate     | High       | Pour batter into pan                                                                                             |
|              |                             |                                                                                                             |            | Scoop Up Pancake                                                                                                 |
|              |                             |                                                                                                             |            | Flip back into pan                                                                                               |
|              |                             |                                                                                                             |            | Scoop up again                                                                                                   |
|              |                             |                                                                                                             |            | Place on plate                                                                                                   |
| 2            | Baking Cookies              | Scoop the cookie batter from a bowl and tap it on the marked area on the cookie sheet                       | High       | Measure the distance from the mark on the sheet and divide the distance into quintiles.                          |
| 3            | Locating Plates/Cutlery     | Placing a knife, fork, plate, napkin and cup on their designated spots on a placemat                        | High       | Place plate close enough to ideal plate location                                                                 |
|              |                             |                                                                                                             |            | Place fork close enough to ideal fork location and orientation                                                   |
|              |                             |                                                                                                             |            | Place knife close enough to ideal knife location and orientation                                                 |
|              |                             |                                                                                                             |            | Place napkin close enough to ideal napkin location and orientation                                               |
|              |                             |                                                                                                             |            | Place cup close enough to ideal cup location                                                                     |
| 4            | Locating Plates/Cutlery     | Placing a knife, fork, plate, napkin and cup on their designated spots on a placemat                        | Medium     | Place plate close enough to ideal plate location                                                                 |
|              |                             |                                                                                                             |            | Place fork close enough to ideal fork location and orientation                                                   |
|              |                             |                                                                                                             |            | Place knife close enough to ideal knife location and orientation                                                 |
|              |                             |                                                                                                             |            | Place napkin close enough to ideal napkin location and orientation                                               |
|              |                             |                                                                                                             |            | Place cup close enough to ideal cup location                                                                     |
| 5            | Throw Ball                  | throw a ball into a basket - 3 trials/short distance                                                        | High       | Measuring the distance from the basket and estimate quintiles                                                    |
| 6            | Throw Ball                  | throw a ball into a basket - 3 trials/medium distance                                                       | Medium     | Measuring the distance from the basket and estimate quintiles                                                    |
| 7            | Throw Ball                  | throw a ball into a basket - 3 trials/after distance                                                        | Low        | Measuring the distance from the basket and estimate quintiles                                                    |
| 8            | Sorting Pills               | Pick up pills in the order of size starting from the biggest and then putting it into the basket            | High       | Pick up largest from set of three pills<br>Put pill in box                                                       |
|              |                             |                                                                                                             |            | Pick up larger pill from a set of two pills<br>Put pill in the box                                               |
|              |                             |                                                                                                             |            | Pick up last pill and put in the box                                                                             |
| 9            | Sorting Pills               | Pick up pills in the order of size starting from the biggest and then putting it into the basket            | Medium     | Pick up largest from set of three pills<br>Put pill in box                                                       |
|              |                             |                                                                                                             |            | Pick up larger pill from a set of two pills<br>Put pill in the box                                               |
|              |                             |                                                                                                             |            | Pick up last pill and put in the box                                                                             |
| 10           | Sorting Pills               | Pick up pills in the order of size starting from the biggest and then putting it into the basket            | Low        | Pick up largest from set of three pills<br>Put pill in box                                                       |
|              |                             |                                                                                                             |            | Pick up larger pill from a set of two pills<br>Put pill in the box                                               |
|              |                             |                                                                                                             |            | Pick up last pill and put in the box                                                                             |
| 11           | Tower Build Same Size       | To stack blocks one on top of the other to build a tower                                                    | High       | Pick up the first block<br>Place the first block close enough to the ideal location/orientation                  |
|              |                             |                                                                                                             |            | Pick up the second block<br>Stack on top of the first block                                                      |
|              |                             |                                                                                                             |            | Pick up and stack the last block                                                                                 |
| 12           | Tower Build Same Size       | To stack blocks one on top of the other to build a tower                                                    | Medium     | Pick up the first block<br>Place the first block close enough to the ideal location/orientation                  |
|              |                             |                                                                                                             |            | Pick up the second block<br>Stack on top of the first block                                                      |
|              |                             |                                                                                                             |            | Pick up and stack the last block                                                                                 |
| 13           | Tower Build Same Size       | To stack blocks one on top of the other to build a tower                                                    | Low        | Pick up the first block<br>Place the first block close enough to the ideal location/orientation                  |
|              |                             |                                                                                                             |            | Pick up the second block<br>Stack on top of the first block                                                      |
|              |                             |                                                                                                             |            | Pick up and stack the last block                                                                                 |
| 14           | Tower Build Different Size  | To stack the blocks by size to make a tower making sure that the biggest block is the bottom                | High       | Pick up largest from set of three blocks<br>Place the first block close enough to the ideal location/orientation |
|              |                             |                                                                                                             |            | Pick up the largest remaining block<br>Stack on top of the first block                                           |
|              |                             |                                                                                                             |            | Pick up and stack the last block                                                                                 |
| 15           | Tower Build Different Size  | To stack the blocks by size to make a tower making sure that the biggest block is the bottom                | Medium     | Pick up largest from set of three blocks<br>Place the first block close enough to the ideal location/orientation |
|              |                             |                                                                                                             |            | Pick up the largest remaining block<br>Stack on top of the first block                                           |
|              |                             |                                                                                                             |            | Pick up and stack the last block                                                                                 |
| 16           | Tower Build Different Size  | To stack the blocks by size to make a tower making sure that the biggest block is the bottom                | Low        | Pick up largest from set of three blocks<br>Place the first block close enough to the ideal location/orientation |
|              |                             |                                                                                                             |            | Pick up the largest remaining block<br>Stack on top of the first block                                           |
|              |                             |                                                                                                             |            | Pick up and stack the last block                                                                                 |
| 17           | Sorting Blocks              | Pick up blocks in the order of size starting from the biggest and then putting it into the basket           | High       | Pick up largest from set of three blocks<br>Put block in box                                                     |
|              |                             |                                                                                                             |            | Pick up larger block from a set of two blocks<br>Put block in the box                                            |
|              |                             |                                                                                                             |            | Pick up last block and put in the box                                                                            |
| 18           | Sorting Blocks              | Pick up blocks in the order of size starting from the biggest and then putting it into the basket           | Medium     | Pick up largest from set of three blocks<br>Put block in box                                                     |
|              |                             |                                                                                                             |            | Pick up larger block from a set of two blocks<br>Put block in the box                                            |
|              |                             |                                                                                                             |            | Pick up last block and put in the box                                                                            |
| 19           | Sorting Blocks              | Pick up blocks in the order of size starting from the biggest and then putting it into the basket           | Low        | Pick up largest from set of three blocks<br>Put block in box                                                     |
|              |                             |                                                                                                             |            | Pick up larger block from a set of two blocks<br>Put block in the box                                            |
|              |                             |                                                                                                             |            | Pick up last block and put in the box                                                                            |
| 20           | Touch the Moving Light Spot | Touch the light spot and follow it across the screen without losing track                                   | High       | Measure the total touch time and divide into quintiles. The higher the touch time higher the score.              |
| 21           | Touch the Moving Light Spot | Touch the light spot and follow it across the screen without losing track                                   | Medium     | Measure the total touch time and divide into quintiles. The higher the touch time higher the score.              |
| 22           | Touch the Moving Light Spot | Touch the light spot and follow it across the screen without losing track                                   | Low        | Measure the total touch time and divide into quintiles. The higher the touch time higher the score.              |
|              | 2-step Tasks                |                                                                                                             |            |                                                                                                                  |
| 23           | Locating Door Handle        | Grab the door handle and push the door open                                                                 | High       | Grab correct door handle<br>Open door by at least 10 degrees                                                     |
| 24           | Locating Door Handle        | Grab the door handle and push the door open                                                                 | Medium     | Grab correct door handle<br>Open door by at least 10 degrees                                                     |
| 25           | Locating Door Handle        | Grab the door handle and push the door open                                                                 | Low        | Grab correct door handle<br>Open door by at least 10 degrees                                                     |
| 26           | Pick up Hair Brush          | pick up a hairbrush lying on the bathroom sink                                                              | High       | Locate hairbrush from 4 possible locations<br>Grab hairbrush                                                     |
| 27           | Pick up Hair Brush          | pick up a hairbrush lying on the bathroom sink                                                              | Medium     | Locate hairbrush from 4 possible locations<br>Grab hairbrush                                                     |
| 28           | Pick up Hair Brush          | pick up a hairbrush lying on the bathroom sink                                                              | Low        | Locate hairbrush from 4 possible locations<br>Grab hairbrush                                                     |
| 29           | Touch Light Spot            | point to a spot of light located in 4 possible random locations                                             | High       | Locate light spot from 4 possible locations<br>Point to the light spot                                           |
| 30           | Touch Light Spot            | point to a spot of light located in 4 possible random locations                                             | Medium     | Locate light spot from 4 possible locations<br>Point to the light spot                                           |
| 31           | Touch Light Spot            | point to a spot of light located in 4 possible random locations                                             | Low        | Locate light spot from 4 possible locations<br>Point to the light spot                                           |
| 32           | Put on Gloves               | align the correct hand in the correct orientation on the glove and hold for 2 seconds                       | High       | Locate the glove<br>Place correct hand in correct orientation                                                    |
| 33           | Put on Gloves               | align the correct hand in the correct orientation on the glove and hold for 2 seconds                       | Medium     | Locate the glove<br>Place correct hand in correct orientation                                                    |
| 34           | Put on Gloves               | align the correct hand in the correct orientation on the glove and hold for 2 seconds                       | Low        | Locate the glove<br>Place correct hand in correct orientation                                                    |
| 35           | Locate Light Switch         | flip the light switch                                                                                       | High       | Locate light switch from 4 possible locations<br>Flip light switch                                               |
| 36           | Locate Light Switch         | flip the light switch                                                                                       | Medium     | Locate light switch from 4 possible locations<br>Flip light switch                                               |
| 37           | Locate Light Switch         | flip the light switch                                                                                       | Low        | Locate light switch from 4 possible locations<br>Flip light switch                                               |
| 38           | Locate Milk carton          | pick up the milk carton from among other items in the fridge                                                | High       | Locate milk Carton among 2 objects<br>Pick milk carton                                                           |
| 39           | Locate Milk carton          | pick up the milk carton from among the other items in the fridge                                            | Medium     | Locate milk Carton among 3 objects<br>Pick milk carton                                                           |
| 40           | Locate Milk carton          | pick up the milk carton from among other items in the fridge                                                | Low        | Locate milk Carton among 4 objects<br>Pick milk carton                                                           |
| 41           | Pick Fruit                  | pick the fruit from the tree                                                                                | High       | Locate Black Grapes from 3 possible locations<br>Pick Black Grapes                                               |
| 42           | Pick Fruit                  | pick the fruit from the tree                                                                                | Medium     | Locate Red Grapes from 3 possible locations<br>Pick Red Grapes                                                   |
| 43           | Pick Fruit                  | pick the fruit from the tree                                                                                | Low        | Locate Green Grapes from 3 possible locations<br>Pick Green Grapes                                               |
| 44           | Give High Five              | give high five to a person using the correct hand                                                           | High       | Locate the raised hand<br>Give high five                                                                         |
| 45           | Give High Five              | give high five to a person using the correct hand                                                           | Medium     | Locate the raised hand<br>Give high five                                                                         |
| 46           | Give High Five              | give high five to a person using the correct hand                                                           | Low        | Locate the raised hand<br>Give high five                                                                         |
| 47           | Locate common items         | pick up wallet, phone and scissors in the correct order from among other items on the table among 4 objects | High       | Locate the object<br>Pick up object                                                                              |
| 48           | Locate common items         | pick up wallet, phone and scissors in the correct order from among other items on the table among 5 objects | Medium     | Locate the object<br>Pick up object                                                                              |
| 49           | Locate common items         | pick up wallet, phone and scissors in the correct order from among other items on the table among 7 objects | Low        | Locate the object<br>Pick up object                                                                              |
| 50           | Whack-a-Mole                | To whack the mole when it pops up from one of the 6 holes                                                   | High       | whack the mole at least X out of N times                                                                         |
| 51           | Whack-a-Mole                | To whack the mole when it pops up from one of the holes                                                     | Medium     | whack the mole at least X out of N times                                                                         |
| 52           | Whack-a-Mole                | To whack the mole when it pops up from one of the holes                                                     | Low        | whack the mole at least X out of N times                                                                         |
| 53           | Cutting Meat                | To cut the meat into half                                                                                   | High       | Cut the meat in 1/2<br>Grab knife                                                                                |
| 54           | Cutting Meat                | To cut the meat into half                                                                                   | Medium     | Cut the meat in 1/2<br>Grab knife                                                                                |
| 55           | Cutting Meat                | To cut the meat into half                                                                                   | Low        | Cut the meat in 1/2<br>Grab knife                                                                                |
